# Supplementary material for: Tunnelling and barrier-less motions in the 2-fluoroethanol–water complex: a rotational spectroscopic and ab initio study
Source: Royal Society of Chemistry journal article supplement (doi:10.1039/c7cp01666b), 2017-01-01
Supplement: c7cp01666b1.pdf [file c7cp01666b1.pdf]

# Supporting Information for

## Tunneling and barrier-less motions in the 2- fluoroethanol···water complex: a rotational spectroscopic and ab initio study

*Wenyuan Huang, Javix Thomas, Wolfgang Jäger, and Yunjie Xu\**

Department of Chemistry, University of Alberta, Edmonton, Alberta T6G 2G2, Canada

\*E-mail: yunjie.xu@ualberta.ca. Fax: 1-780-492-8231.

### Contents

|                                                                                                      |    |
|------------------------------------------------------------------------------------------------------|----|
| <b>Table S1</b> Calculated energies and spectroscopic constants of the 2-FE monohydrate.             | S2 |
| <b>Figure S1</b> Relative energies of <b>I</b> , <b>II</b> , and the transition state of OH wagging. | S2 |
| <b>Figure S2</b> QTAIM and NCI plots of 2-FE and 2-FE···FE                                           | S3 |
| <b>Table S2</b> Measured transition frequencies of 2-FE                                              | S3 |
| <b>Table S3</b> Measured transition frequencies of the D isotopologues of 2-FE                       | S4 |
| Completion of Ref. 30.                                                                               | S5 |

**Table S1.** ZPE corrected ( $\Delta E_0$ ) and ZPE/BSSE corrected ( $\Delta E_0^{\text{BSSE}}$ ) energies (in  $\text{kJ mol}^{-1}$ ), rotational constants (in MHz), and electric dipole moments (in Debye) of the three most stable conformers of 2- $\text{FE}\cdots\text{water}$  at the B3LYP-D3BJ/6-311++G(2d,p) level of theory.

| Parameters                   | iG+g- I | iG+g- II | aG+g- III | aG+g- IV | aG+g- V | iG+t VI |
|------------------------------|---------|----------|-----------|----------|---------|---------|
| $\Delta E_0^{\text{a}}$      | 0.00    | 0.79     | 5.35      | 8.46     | 13.11   | 14.22   |
| $\Delta E_0^{\text{BSSE b}}$ | 0.00    | 0.81     | 4.30      | 7.14     | 11.49   | 14.12   |
| $A$                          | 4898    | 4869     | 6093      | 13953    | 5995    | 4759    |
| $B$                          | 3464    | 3469     | 2401      | 1526     | 2386    | 3300    |
| $C$                          | 2193    | 2179     | 2082      | 1458     | 2056    | 2163    |
| $ \mu_a $                    | 0.61    | 0.88     | 0.00      | 1.33     | 1.20    | 4.85    |
| $ \mu_b $                    | 1.52    | 1.53     | 1.19      | 0.54     | 1.01    | 1.01    |
| $ \mu_c $                    | 0.31    | 2.03     | 0.56      | 1.38     | 0.20    | 0.41    |

<sup>a</sup> Zero-point-energy corrected electronic energy relative to the lowest energy conformer, iG+g- I.

<sup>b</sup> Zero-point-energy and counterpoise-corrected energy relative to iG+g- I.

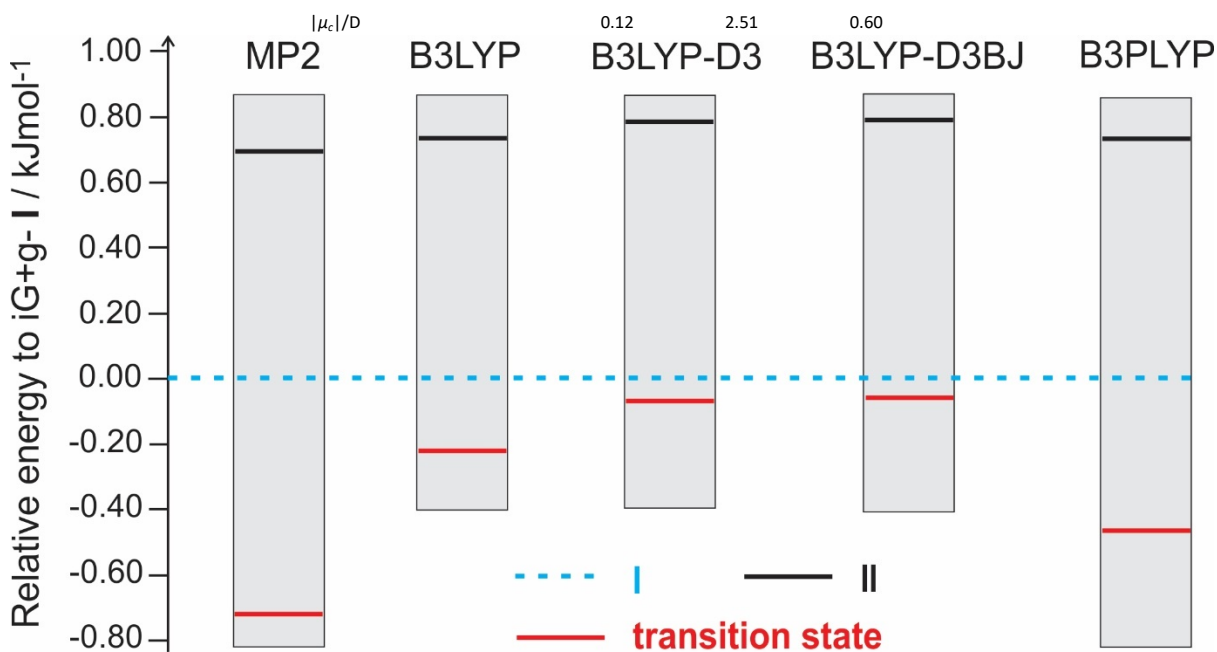

**Figure S1.** The relative energy values for iG+g- I, iG+g- II, and the transition state for the wagging motion with zero point energy correction at different levels of theory. All the relative values are with respect to iG+g- I. Please note that iG+g- II is predicted to be less stable than iG+g- I in all cases, while the transition state is predicted to be lower in energy than iG+g- I after zero-point-energy correction, indicating that the wagging motion is barrier-less.

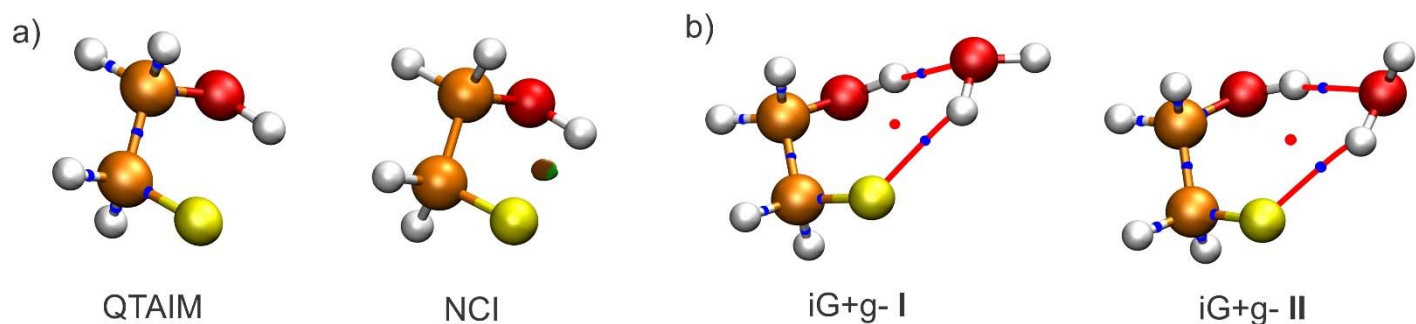

**Figure S2.** a) QTAIM and NCI plots of the 2-FE monomer. The attractive interaction between OwH...F contact is indicated by the small green surface. The brown surface represents the repulsive interaction mainly between the F and O atoms. b) QTAIM plots of the two most stable minima of 2-FE...H<sub>2</sub>O.

**Table S2.** Measured rotational transition frequencies of the para and ortho states of the most stable 2-FE...H<sub>2</sub>O conformer.

| J' | Ka' | Kc' | J'' | Ka'' | Kc'' | Para                          |                                   | Ortho                         |                                   |
|----|-----|-----|-----|------|------|-------------------------------|-----------------------------------|-------------------------------|-----------------------------------|
|    |     |     |     |      |      | $\nu_{\text{exp}}/\text{MHz}$ | $\Delta\nu^{\text{a}}/\text{kHz}$ | $\nu_{\text{exp}}/\text{MHz}$ | $\Delta\nu^{\text{a}}/\text{kHz}$ |
| 1  | 1   | 1   | 0   | 0    | 0    | 7125.4017                     | -4.9                              | 7125.4245                     | -1.3                              |
| 2  | 0   | 2   | 1   | 1    | 0    | 7828.3701                     | -0.8                              | 7828.3518                     | -0.6                              |
| 1  | 1   | 0   | 0   | 0    | 0    | 8319.2198                     | 2.7                               | 8319.2809                     | -2.0                              |
| 2  | 2   | 1   | 2   | 1    | 2    | 8345.4033                     | -0.4                              | 8345.4679                     | 3.0                               |
| 2  | 2   | 0   | 2   | 1    | 2    | 8809.8846                     | 1.3                               | 8809.9701                     | 0.7                               |
| 2  | 0   | 2   | 1   | 1    | 1    | 9022.1854                     | 4.0                               | 9022.2066                     | -2.9                              |
| 3  | 3   | 1   | 3   | 2    | 1    | 9183.3204                     | -0.4                              | 9183.3345                     | 2.7                               |
| 2  | 1   | 2   | 1   | 1    | 1    | 9880.9145                     | -1.2                              | 9880.9326                     | 4.3                               |
| 3  | 2   | 2   | 2   | 1    | 2    |                               |                                   | 10386.8100                    | -4.3                              |
| 2  | 0   | 2   | 1   | 0    | 1    | 10610.1973                    | 5.6                               | 10610.1973                    | -7.1                              |
| 3  | 0   | 3   | 2   | 1    | 1    | 10644.3243                    | -3.2                              |                               |                                   |
| 3  | 3   | 1   | 3   | 2    | 2    | 11175.0730                    | 1.6                               | 11175.1035                    | -3.6                              |
| 4  | 1   | 3   | 4   | 0    | 4    | 11273.2887                    | 0.1                               | 11272.9882                    | -0.5                              |
| 3  | 3   | 0   | 3   | 2    | 2    | 11298.7104                    | -1.5                              | 11298.7544                    | 1.5                               |
| 2  | 1   | 2   | 1   | 0    | 1    | 11468.9262                    | 0.3                               | 11468.9262                    | 3.0                               |
| 2  | 1   | 1   | 1   | 1    | 0    | 12268.4737                    | -2.2                              | 12268.5307                    | 2.8                               |
| 3  | 1   | 2   | 2   | 2    | 1    | 13263.9648                    | 0.1                               | 13263.9110                    | 5.2                               |
| 3  | 0   | 3   | 2   | 1    | 2    | 14225.6980                    | -0.2                              | 14225.6875                    | -4.7                              |
| 3  | 1   | 3   | 2   | 1    | 2    | 14570.4460                    | -3.9                              | 14570.4460                    | -0.8                              |
| 2  | 1   | 1   | 1   | 0    | 1    | 15050.2917                    | -5.0                              |                               |                                   |
| 3  | 0   | 3   | 2   | 0    | 2    | 15084.4356                    | 3.2                               | 15084.4105                    | -0.5                              |
| 3  | 1   | 3   | 2   | 0    | 2    | 15429.1877                    | 3.5                               | 15429.1657                    | 0.1                               |
| 2  | 2   | 1   | 1   | 1    | 0    |                               |                                   | 17032.5391                    | 3.1                               |
| 2  | 2   | 0   | 1   | 1    | 0    | 17496.9895                    | 1.0                               |                               |                                   |

<sup>a</sup> $\Delta\nu = \nu_{\text{exp}} - \nu_{\text{cal}}$ .

**Table S3.** Measured rotational transition frequencies of the seven D substituted most stable 2-FE $\cdots$ H<sub>2</sub>O conformer.

| J'Ka'Kc'-<br>J''Ka''Kc'' | 2FE $\cdots$ DOH        |                    | 2FE $\cdots$ HOD        |                    | 2FE $\cdots$ D <sub>2</sub> O |                    | 2FEOD $\cdots$ DOH      |                    |
|--------------------------|-------------------------|--------------------|-------------------------|--------------------|-------------------------------|--------------------|-------------------------|--------------------|
|                          | $\nu_{\text{exp}}$ /MHz | $\Delta\nu^a$ /kHz | $\nu_{\text{exp}}$ /MHz | $\Delta\nu^a$ /kHz | $\nu_{\text{exp}}$ /MHz       | $\Delta\nu^a$ /kHz | $\nu_{\text{exp}}$ /MHz | $\Delta\nu^a$ /kHz |
| 111-000                  | 7055.3598               | 1.4                | 7037.3551               | -1.1               | 6972.7026                     | -0.6               | 6971.2649               | 0.3                |
| 221-212                  | 8226.2280               | -5.7               | 8119.0322               | -5.6               | 8035.6160                     | -8.9               | 8149.0485               | -0.4               |
| 110-000                  | 8305.0481               | 1.4                | 8562.5364               | 1.4                | 8519.4537                     | 4.3                | 8150.2602               | -7.4               |
| 202-111                  | 8870.1313               | 6.4                | 8392.1257               | 2.9                | 8261.0474                     | -0.9               | 8861.7857               | -1.3               |
| 212-111                  | 9744.7883               | -0.5               | 9447.9188               | 1.1                | 9328.5932                     | -3.0               | 9686.6741               | -4.0               |
| 322-313                  | 10303.5597              | 1.7                |                         |                    |                               |                    |                         |                    |
| 202-101                  | 10467.6143              | -4.9               | 10164.6452              | 1.1                | 10037.9691                    | 2.0                | 10400.7794              | -1.3               |
| 212-101                  | 11342.2836              | 0.5                | 11220.4412              | 2.2                | 11105.5254                    | 10.4               | 11225.6645              | -7.3               |
| 211-110                  | 12086.4905              | 7.2                | 11611.1944              | -7.3               | 11454.3908                    | 1.4                | 12042.1889              | 6.9                |
| 303-212                  | 14017.7270              | -14.0              | 13488.5233              | -7.6               | 13304.3175                    | -4.2               | 13952.5235              | -5.2               |
| 313-212                  | 14374.7554              | 4.8                | 13971.8533              | 1.9                | 13798.8935                    | 6.1                | 14279.8308              | 3.4                |
| 211-101                  | 14854.8522              | -0.7               | 14465.4135              | 9.0                | 14294.2352                    | 5.3                | 14758.9599              | -0.1               |
| 303-202                  | 14892.4019              | -3.0               | 14544.3320              | 6.2                | 14371.8628                    | -6.8               | 14777.4126              | -7.2               |
| 313-202                  | 15249.4258              | 11.3               | 15027.6445              | -1.8               | 14866.4382                    | 3.0                | 15104.7274              | 8.9                |
| 221-110                  | 16878.9558              | -4.5               | 16928.7675              | -3.6               | 16785.1163                    | -7.6               | 16659.1686              | 7.2                |

| J'Ka'Kc'-<br>J''Ka''Kc'' | 2FEOD $\cdots$ HOD      |                    | 2FEOD $\cdots$ H <sub>2</sub> O |                    | 2FEOD $\cdots$ D <sub>2</sub> O |                    |
|--------------------------|-------------------------|--------------------|---------------------------------|--------------------|---------------------------------|--------------------|
|                          | $\nu_{\text{exp}}$ /MHz | $\Delta\nu^a$ /kHz | $\nu_{\text{exp}}$ /MHz         | $\Delta\nu^a$ /kHz | $\nu_{\text{exp}}$ /MHz         | $\Delta\nu^a$ /kHz |
| 111-000                  | 6956.8538               | 2.5                | 7044.2245                       | -7.9               | 6889.9123                       | 6.9                |
| 221-212                  | 8410.4200               | 1.0                | 8243.2325                       | 4.4                | 7960.5269                       | -7.0               |
| 110-000                  |                         |                    | 8201.4031                       | -8.6               | 8358.6991                       | -5.1               |
| 202-111                  | 8390.2066               | 0.6                | 9005.4451                       | -5.1               | 8265.9040                       | -2.0               |
| 212-111                  | 9394.7509               | -7.5               | 9819.6941                       | 6.8                | 9277.8685                       | -6.0               |
| 202-101                  | 10105.5903              | -3.7               | 10540.2880                      | -6.4               | 9981.5278                       | -2.3               |
| 212-101                  | 11110.1575              | 11.1               | 11354.5258                      | -5.8               | 10993.4984                      | -0.2               |
| 211-110                  | 11570.9226              | 1.3                | 12217.5591                      | 2.4                | 11419.0947                      | 2.5                |
| 303-212                  | 13436.7484              | 4.1                | 14153.0429                      | -4.4               | 13258.9776                      | -4.7               |
| 313-212                  | 13885.9246              | -2.4               | 14471.7669                      | 0.0                | 13716.0138                      | 8.1                |
| 211-101                  | 14374.4147              | 1.7                | 14951.3988                      | 2.3                | 14205.3516                      | 6.8                |
| 303-202                  | 14441.2924              | -4.2               | 14967.2863                      | 1.9                | 14270.9436                      | -7.2               |
| 313-202                  | 14890.4824              | 3.0                | 15286.0060                      | 1.9                | 14727.9781                      | 3.9                |
| 221-110                  | 16717.0682              | -5.4               | 16822.1120                      | 8.6                | 16565.9513                      | 1.2                |

$$^a\Delta\nu = \nu_{\text{exp}} - \nu_{\text{cal}}$$

**Table S4.** Comparison of the substitution and theoretical coordinates.

|    | Exp.        | iG+g- I |        | iG+g- II |             | Exp.   | iG+g- I |   | iG+g- II    |        | Exp.   | iG+g- I |  | iG+g- II |  |
|----|-------------|---------|--------|----------|-------------|--------|---------|---|-------------|--------|--------|---------|--|----------|--|
|    |             |         |        |          |             |        |         |   |             |        |        |         |  |          |  |
| H9 |             |         |        |          |             | H11    |         |   |             |        | H12    |         |  |          |  |
| a  | $\pm 0.823$ | 0.835   | 0.810  | a        | $\pm 1.496$ | 1.637  | 1.673   | a | $\pm 2.997$ | 3.001  | 2.865  |         |  |          |  |
| b  | $\pm 1.100$ | 1.129   | 1.129  | b        | $\pm 0.922$ | -0.906 | -0.888  | b | $\pm 0.000$ | -0.291 | -0.193 |         |  |          |  |
| c  | $\pm 0.213$ | -0.292  | -0.220 | c        | $\pm 0.248$ | 0.009  | 0.073   | c | $\pm 0.429$ | -0.351 | 0.760  |         |  |          |  |

## Completion of Ref. 30.

Gaussian 09 (Revision D.01), M. J. Frisch, G. W. Trucks, H. B. Schlegel, G. E. Scuseria, M. A. Robb, J. R. Cheeseman, G. Scalmani, V. Barone, B. Mennucci, G. A. Petersson, H. Nakatsuji, M. Caricato, X. Li, H. P. Hratchian, A. F. Izmaylov, J. Bloino, G. Zheng, J. L. Sonnenberg, M. Hada, M. Ehara, K. Toyota, R. Fukuda, J. Hasegawa, M. Ishida, T. Nakajima, Y. Honda, O. Kitao, H. Nakai, T. Vreven, J. A. Montgomery, Jr., J. E. Peralta, F. Ogliaro, M. Bearpark, J. J. Heyd, E. Brothers, K. N. Kudin, V. N. Staroverov, T. Keith, R. Kobayashi, J. Normand, K. Raghavachari, A. Rendell, J. C. Burant, S. S. Iyengar, J. Tomasi, M. Cossi, N. Rega, J. M. Millam, M. Klene, J. E. Knox, J. B. Cross, V. Bakken, C. Adamo, J. Jaramillo, R. Gomperts, R. E. Stratmann, O. Yazyev, A. J. Austin, R. Cammi, C. Pomelli, J. W. Ochterski, R. L. Martin, K. Morokuma, V. G. Zakrzewski, G. A. Voth, P. Salvador, J. J. Dannenberg, S. Dapprich, A. D. Daniels, O. Farkas, J. B. Foresman, J. V. Ortiz, J. Cioslowski, D. J. Fox, Gaussian, Inc., Wallingford CT, **2013**.
